# Supplementary material for: A simple and practical wax-encapsulation method for air-sensitive XAS samples
Source: Royal Society of Chemistry journal article supplement (doi:10.1039/d5qi01913c), 2025-10-27
Supplement: d5qi01913c3.pdf [file d5qi01913c3.pdf]

## Supporting Information

### A simple and practical wax-encapsulation method for air-sensitive XAS samples

Oscar Oehlsen, Frank MacGregor, Matthew J. F. Jones, Alejandra Gómez-Torres, Liane M. Moreau, Joshua Wright, Lu Ma, and Skye Fortier\*

Department of Chemistry and Biochemistry, University of Texas at El Paso, El Paso, Texas 79968, United States

National Synchrotron Light Source II, Brookhaven National Laboratory, Upton, NY 11973, United States

Department of Chemistry, University of Wyoming, Laramie, Wyoming, 82071, United States

Department of Physics, Illinois Institute of Technology, Chicago, Illinois 60616, United States

\*To whom correspondence should be addressed. Email: [asfortier@utep.edu](mailto:asfortier@utep.edu)

## Table of Contents

|                                                                                                                                                                                        |     |
|----------------------------------------------------------------------------------------------------------------------------------------------------------------------------------------|-----|
| <b>Figure S1.</b> Normalized uranium L <sub>3</sub> -edge XANES of U(NR <sub>2</sub> ) <sub>3</sub> (R = SiMe <sub>3</sub> ) ( <b>1</b> ) using the polyethylene envelope method ..... | S3  |
| <b>Figure S2.</b> First derivative XANES of <b>1</b> using the polyethylene envelope method.....                                                                                       | S4  |
| <b>Figure S3.</b> Stepwise preparation of a wax coin from a boron nitride pellet .....                                                                                                 | S5  |
| <b>Figure S4.</b> Beamline stage alignment and centering of wax coin samples .....                                                                                                     | S6  |
| <b>Figure S5.</b> Wax coins of <b>1</b> sealed in EVOH/poly-nylon and stored for 0–15 days .....                                                                                       | S7  |
| <b>Figure S6.</b> Wax coin mounted in a 3D-printed sample rack and vacuum-sealed.....                                                                                                  | S8  |
| <b>Figure S7.</b> Normalized uranium L <sub>3</sub> -edge XANES of <b>1</b> and reference compounds in wax coins.....                                                                  | S9  |
| <b>Figure S8.</b> First derivative XANES of <b>1</b> and reference compounds in wax coins .....                                                                                        | S10 |
| <b>Figure S9.</b> Reproducible uranium L <sub>3</sub> -edge XANES spectra of UCl <sub>4</sub> using a separate run of the polyethylene envelope method .....                           | S11 |
| <b>Figure S10.</b> First derivative XANES spectra of UCl <sub>4</sub> using the polyethylene envelope method, confirming reproducibility across containment methods .....              | S12 |

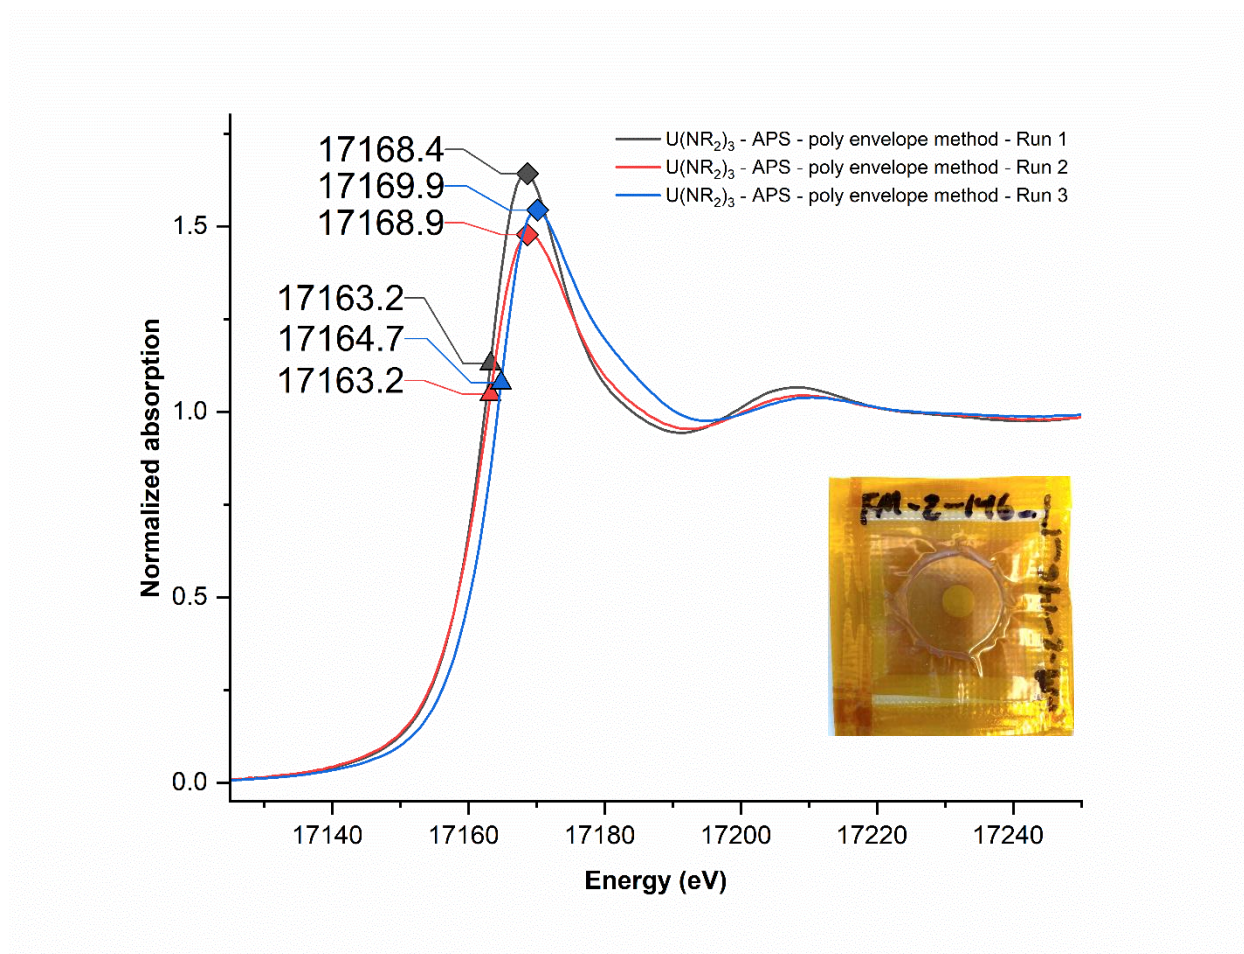

**Fig. S1** Uranium L<sub>3</sub>-edge XANES spectra of three independently prepared compressed boron nitride pellets of  $\text{U}(\text{NR}_2)_3$  ( $\text{R} = \text{SiMe}_3$ ) (1), each encapsulated using a previously reported method involving vacuum-sealed polyethylene envelopes.<sup>1</sup> An inset photograph shows a representative polyethylene envelope used in this encapsulation technique. The spectra were collected across separate attempts and exhibit misaligned edge energies and variability in spectral features, consistent with adventitious oxidation during handling or prior to measurement. Data were previously collected at the Advanced Photon Source (APS) at sector 10-BM and are referenced to yttrium foil (17038.4 eV).

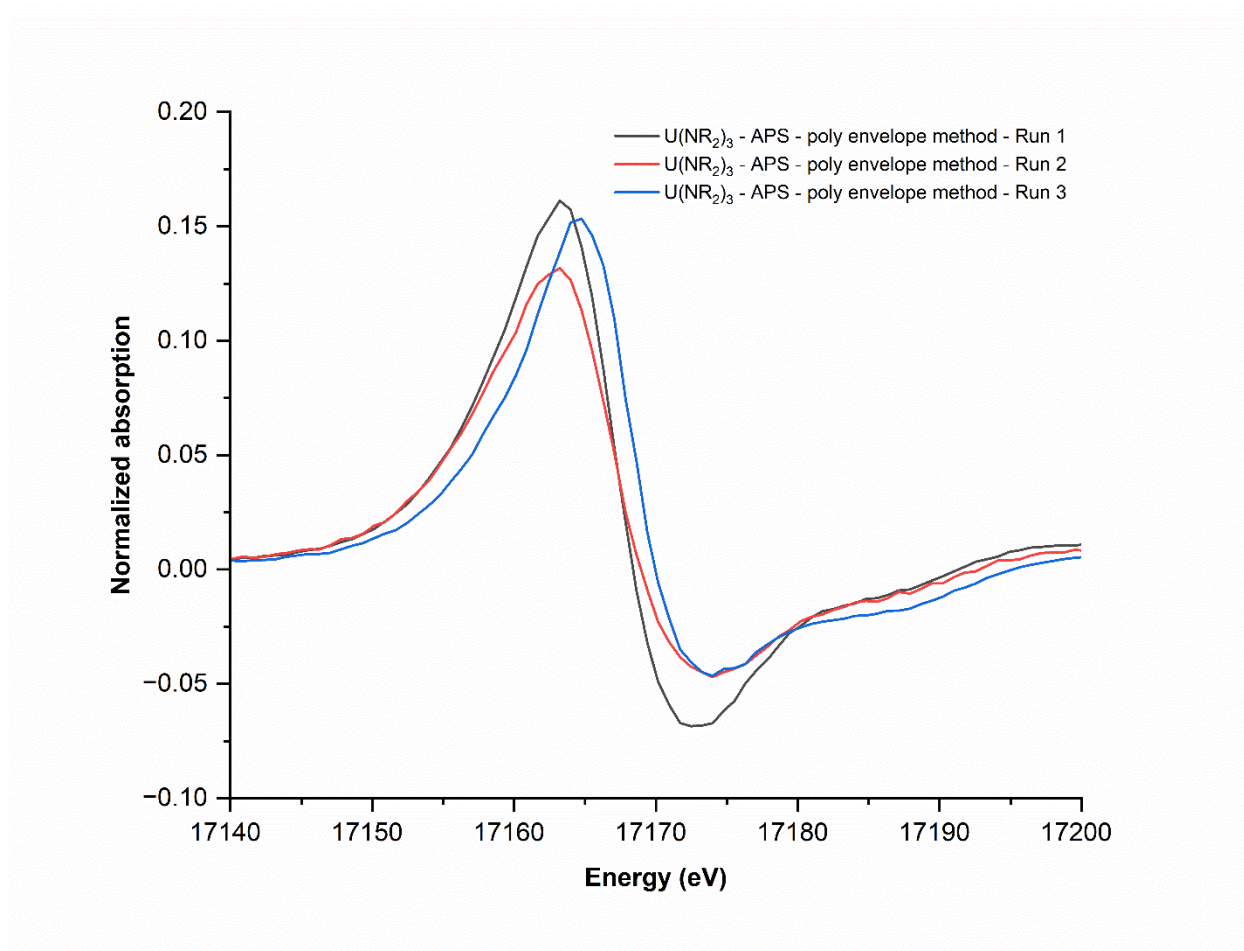

**Fig. S2** Uranium L<sub>3</sub>-edge XANES spectra, expressed as the first derivative, of three independently prepared compressed boron nitride pellets of **1**, each encapsulated using a previously reported method involving vacuum-sealed polyethylene envelopes (see **Figure S1**).<sup>1</sup> The spectra were collected across separate attempts and exhibit misaligned edge energies and variability in spectral features, consistent with adventitious oxidation during handling or prior to measurement. Data were previously collected at the APS at sector 10-BM and are referenced to yttrium foil (17038.4 eV).

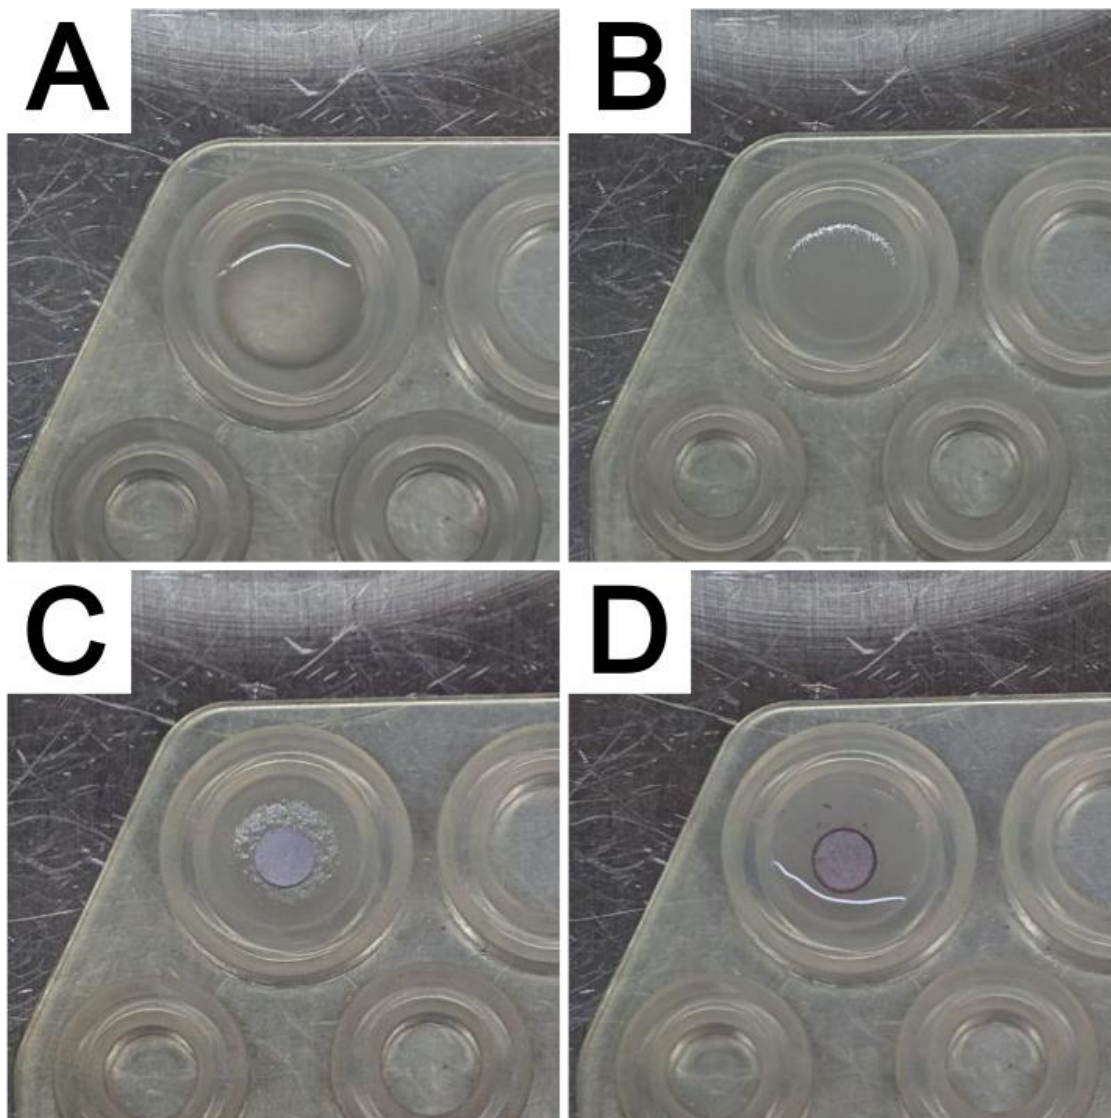

**Fig S3** Stepwise preparation of a wax coin of **1**. A bottom layer of molten paraffin wax (**A**) is first partially cooled in a silicone ring mold (**B**), followed by placement of a pressed boron nitride pellet of **1** (**C**) and subsequent encapsulation with additional molten wax (**D**).

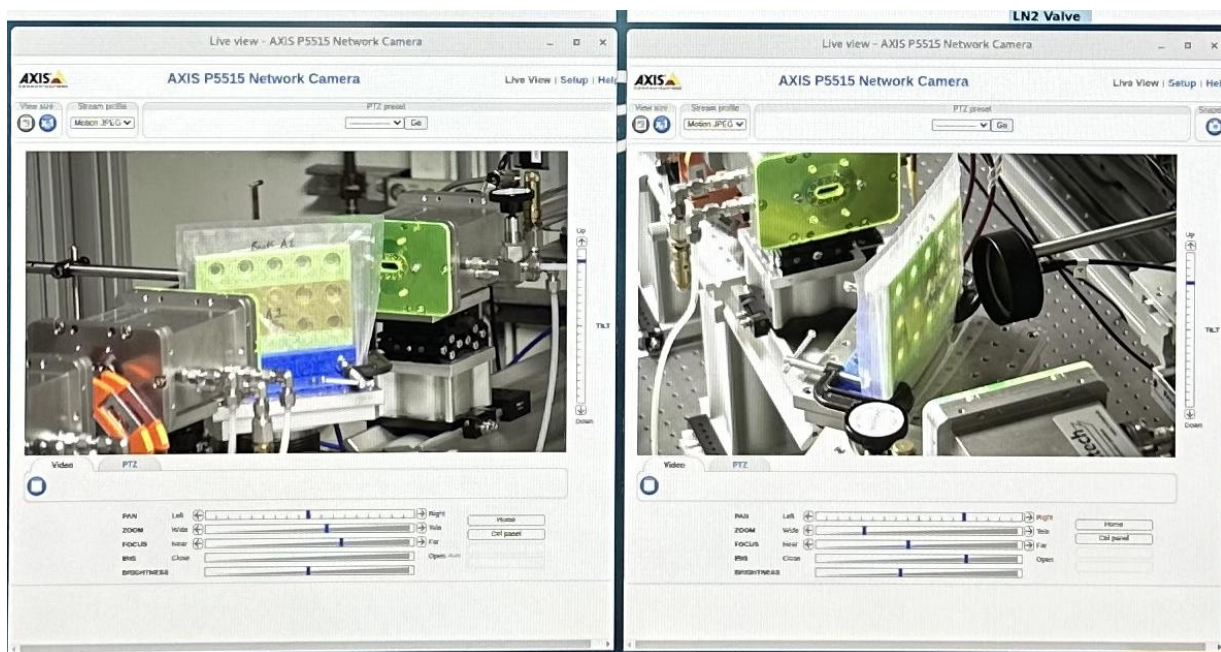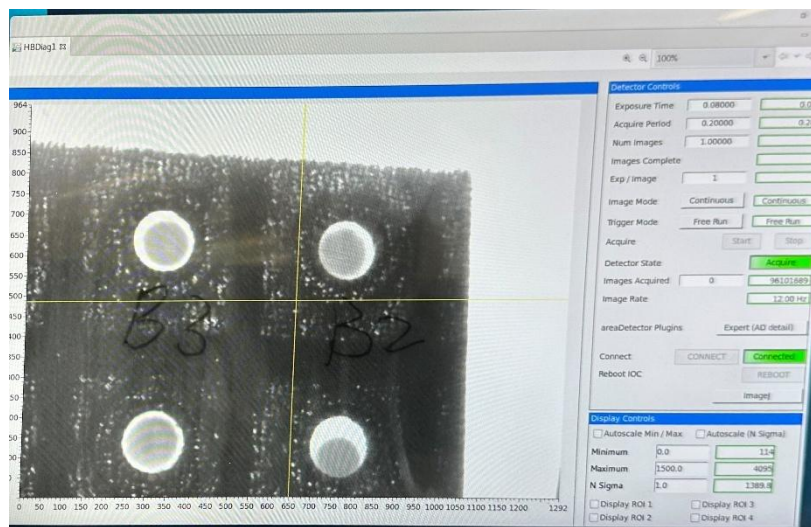

**Fig S4 Top:** Photographs showing stage alignment of the mounted sample rack at the beamline. **Bottom:** Centering of individual sample pellets (visible as dark circles). The partial translucency of the wax coins facilitates visual alignment and centering during measurement.

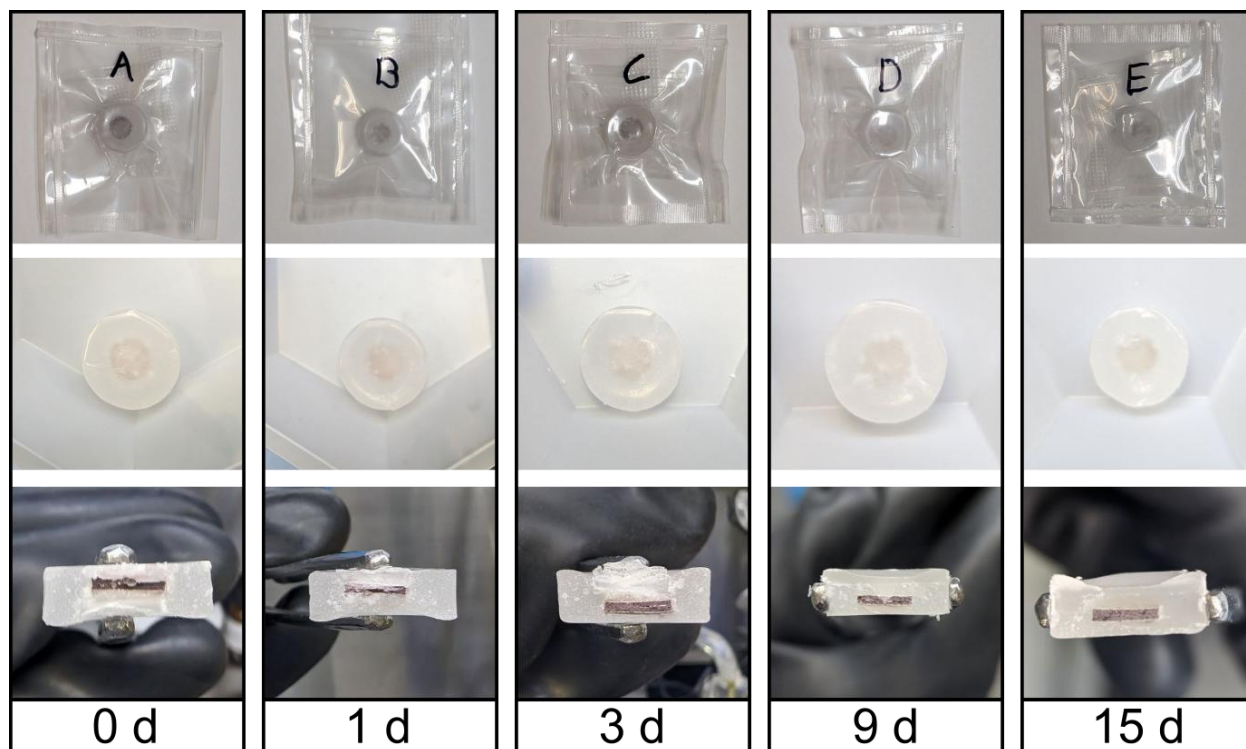

**Fig S5 Top:** Photograph showing a series of boron nitride pellets of **1**, prepared as wax coins, vacuum sealed within layers of food grade ethylene vinyl alcohol (EVOH, 3 mil, 0.0762 mm) and co-extruded polyethylene nylon (poly-nylon, 5 mil, 0.127 mm) polymers. **Bottom:** Extracted sample pellets and their corresponding cross-sections after storage of the sample pouches under ambient conditions for  $t = 0, 1, 3, 9$ , and 15 days.

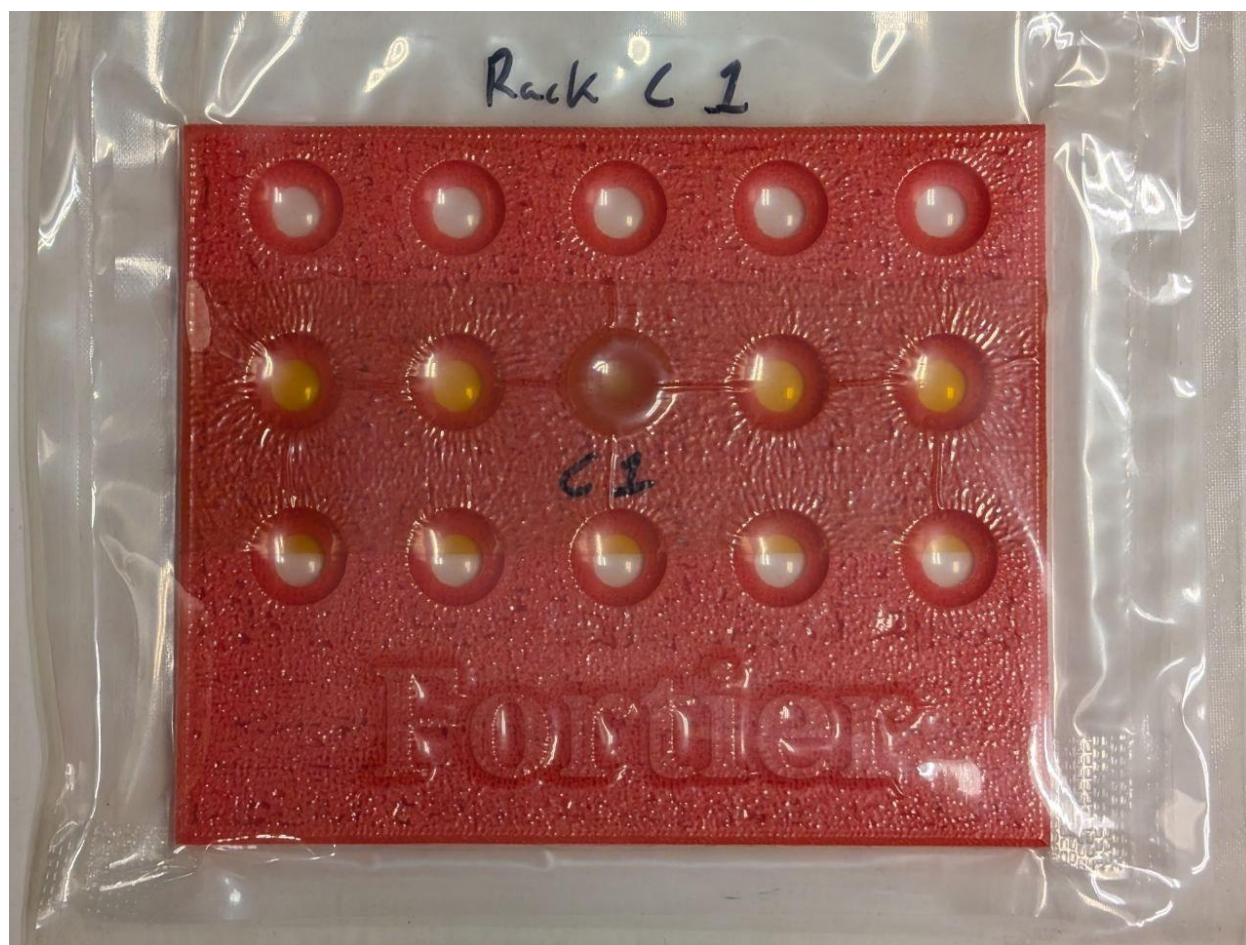

**Fig. S6** Photograph of a wax coin fitted within a 3D-printed sample rack (160 mm × 145 mm × 7 mm), vacuum sealed within food-grade EVOH and poly-nylon films.

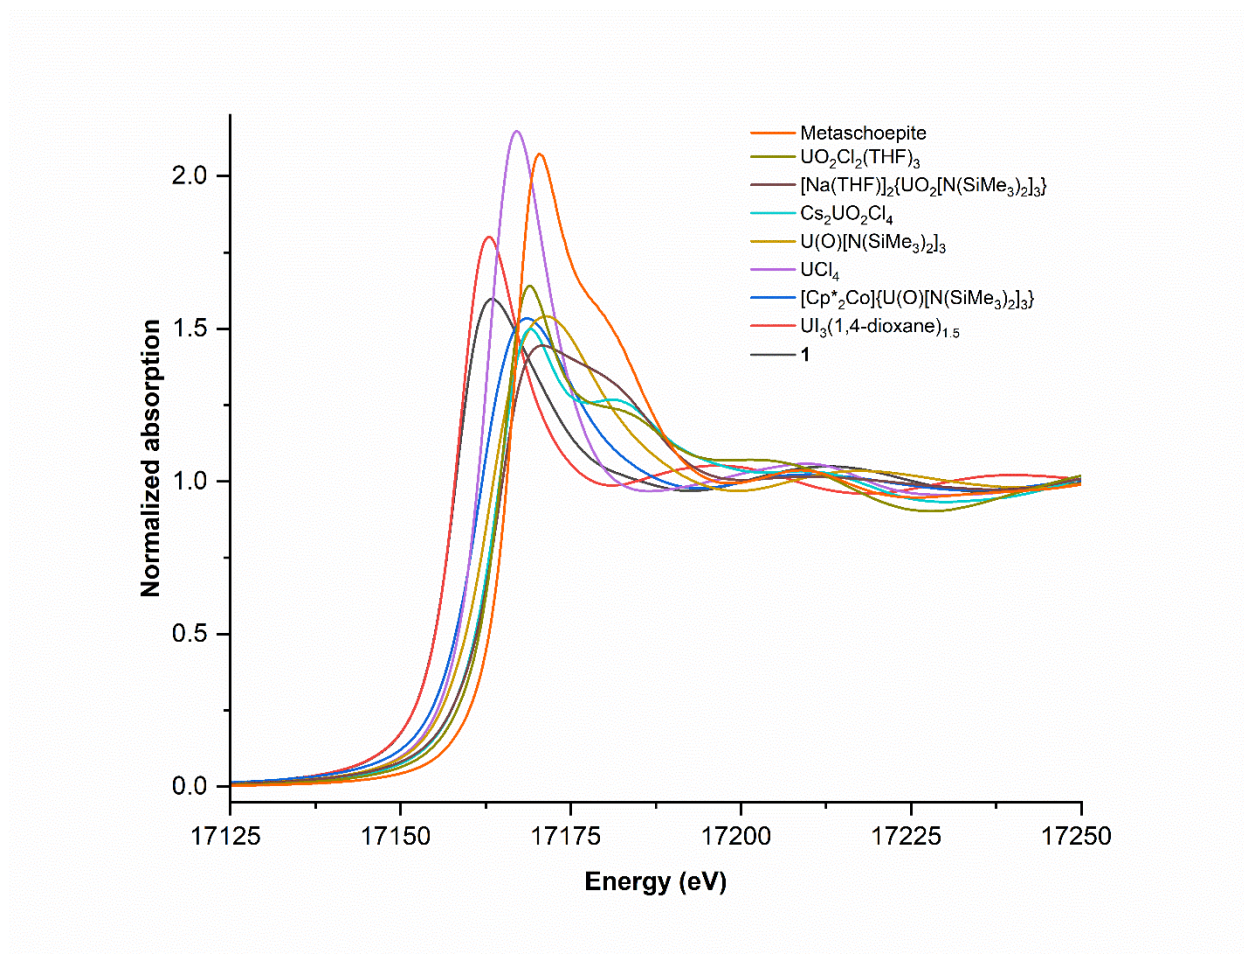

**Fig. S7** Normalized uranium  $L_3$ -edge XANES spectral plots for **1** and selected reference compounds, each prepared as wax coins.

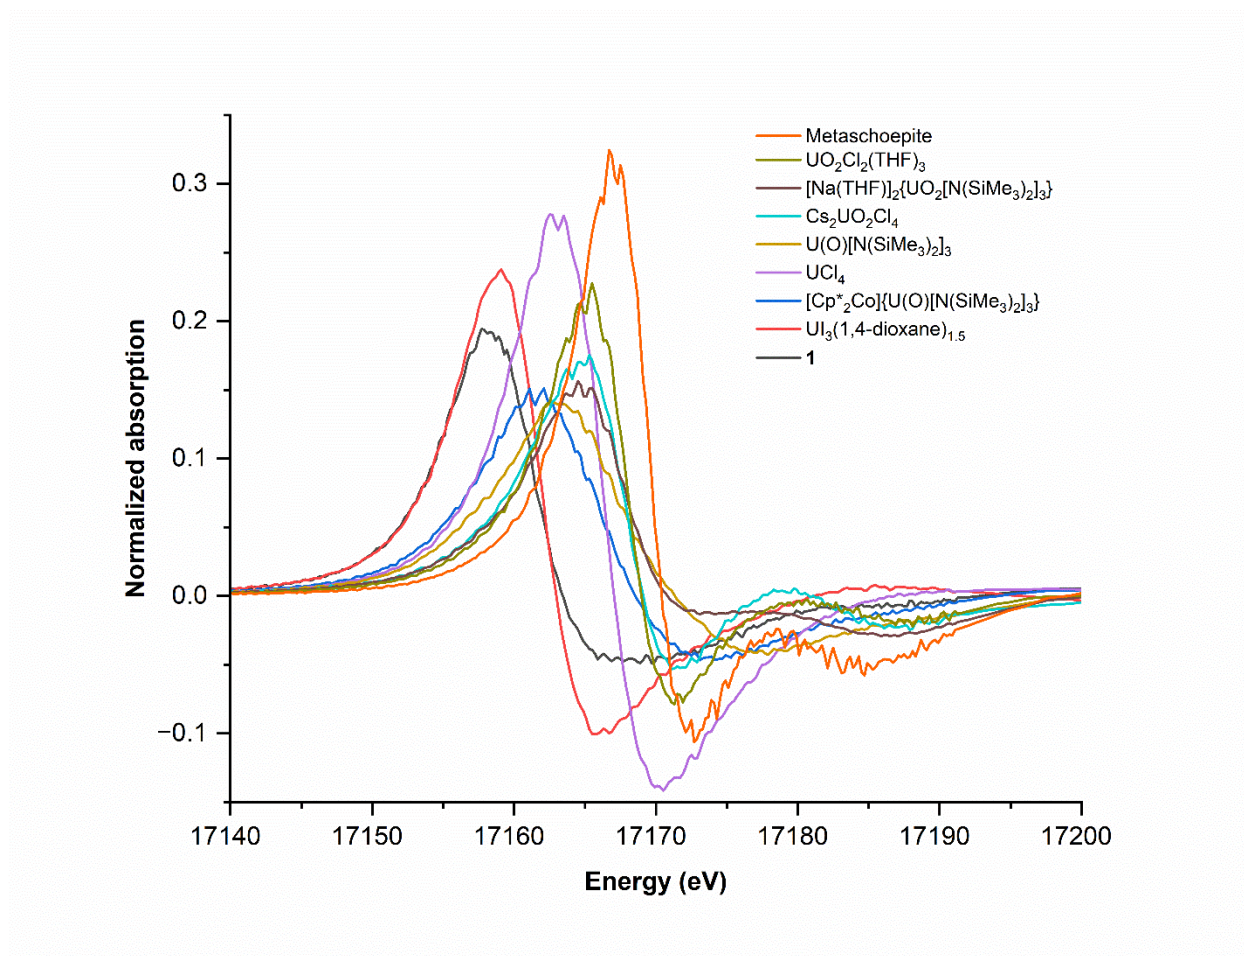

**Fig. S8** First derivative uranium L<sub>3</sub>-edge XANES spectral plots for **1** and selected reference compounds, each prepared as wax coins.

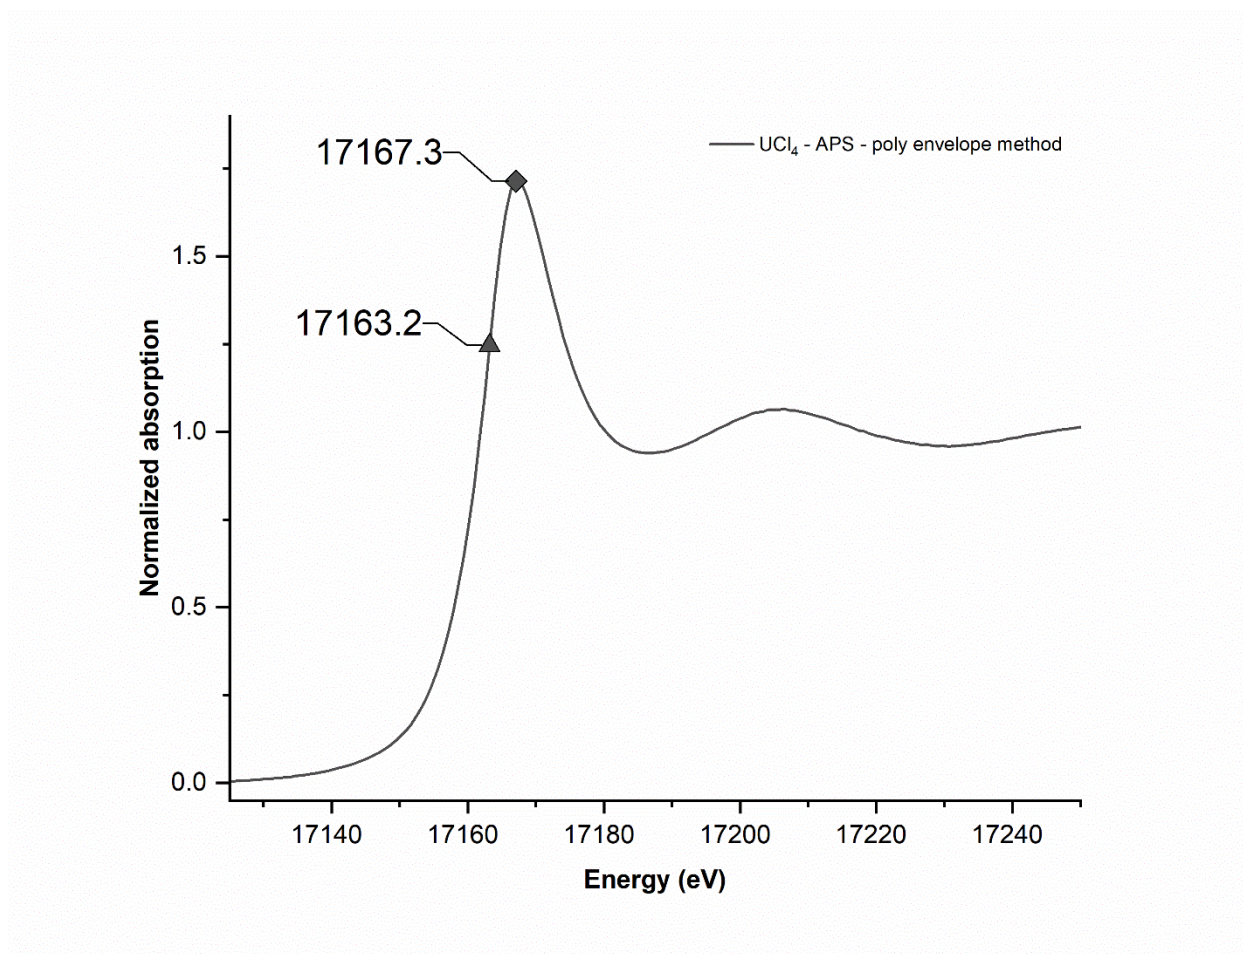

**Fig. S9** Averaged uranium L<sub>3</sub>-edge XANES spectra of three independently prepared UCl<sub>4</sub> samples, each dispersed in compressed boron nitride and encapsulated using our previously reported vacuum-sealed polyethylene envelope method.<sup>1</sup> Data were collected during a separate run at sector 10-BM of the APS and initially referenced to an yttrium foil (17,038.4 eV), followed by secondary alignment to the edge energy of the shared UO<sub>2</sub>Cl<sub>2</sub>(THF)<sub>3</sub> standard (17,165.1 eV). The resulting edge energy (17,163.2 eV) closely matches the value obtained using the wax coin method, supporting the reproducibility of the measurement and confirming the anomalous nature of our earlier reported UCl<sub>4</sub> value.<sup>1</sup>

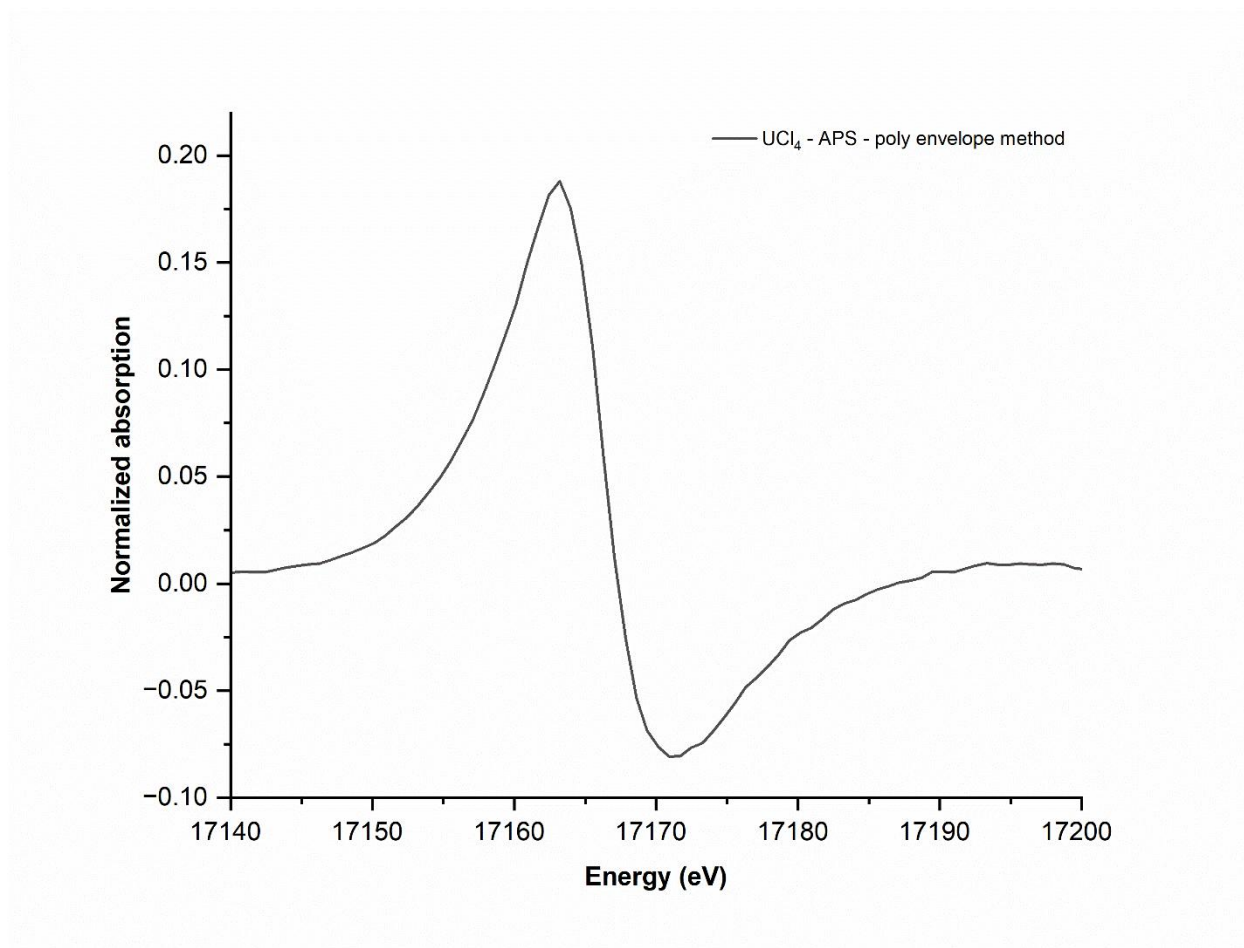

**Fig. S10** First derivative uranium L<sub>3</sub>-edge XANES spectra of three independently prepared UCl<sub>4</sub> samples, each dispersed in compressed boron nitride and encapsulated using our previously reported vacuum-sealed polyethylene envelope method.<sup>1</sup> Data were collected during a separate run at sector 10-BM of the APS and initially referenced to an yttrium foil (17,038.4 eV), followed by secondary alignment to the edge energy of the shared UO<sub>2</sub>Cl<sub>2</sub>(THF)<sub>3</sub> standard (17,165.1 eV). The resulting edge energy (17,163.2 eV) closely matches the value obtained using the wax coin method, supporting the reproducibility of the measurement and confirming the anomalous nature of our earlier reported UCl<sub>4</sub> value.<sup>1</sup>

## Reference

- 1 J. Murillo, R. Bhowmick, K. L. M. Harriman, A. Gomez-Torres, J. Wright, R. W. Meulenberg, P. Miró, A. Metta-Magaña, M. Murugesu, B. Vlasisavljevich and S. Fortier, Actinide arene-metalates: ion pairing effects on the electronic structure of unsupported uranium–arenide sandwich complexes, *Chem. Sci.*, 2021, **12**, 13360-13372.
